# Supplementary material for: Understanding Practical, Robust Implementation and Sustainability of Home-based Comprehensive Sexual Health Care: A Realist Review
Source: PubMed Central journal article supplement (PMC11427609; doi:10.1007/s10461-024-04415-x), 2024-07-04
Supplement: 10461_2024_4415_MOESM2_ESM.pdf [file 10461_2024_4415_MOESM2_ESM.pdf]

## Supplementary Information 2. Inclusion and exclusion criteria

### Inclusion criteria:

- Date of publication: up to 10 years ago
- Language: English
- Study design: ALL
- Population: primarily focused on key populations (e.g., young individuals, migrants, sex workers, MSM, transgender people, gender diverse people, bisexual and homosexual men, swingers, PWID, PLWHIV)
- Intervention: home-based comprehensive sexual health care with (online) self-sampling for HIV and/or STI testing and AT LEAST one of these care elements:
  - Results provision
  - Treatment
  - Partner notification
  - Health promotion/prevention
  - Retesting/repeat testing
- Studies should report AT LEAST one of these **outcomes** and/or **constructs\*** (Following PRISM outcomes)

### Exclusion criteria:

- Non-human studies
- Validation studies with only test related results (sensitivity, specificity)
- Intervention has no HIV testing component
  - Unless key population is HIV positive

\*Table of constructs related to PRISM outcomes: reach, effectiveness, adoption, implementation, and maintenance.

| <b>PRISM</b>         | <b>Answer to...</b>                                                   | <b>Signal words</b>                                                                                       |
|----------------------|-----------------------------------------------------------------------|-----------------------------------------------------------------------------------------------------------|
| <b>Reach</b>         | “How do I reach the targeted population?”                             | Reach<br>Target<br>Number of ...<br>Proportion of ...<br>Represent                                        |
| <b>Effectiveness</b> | “How do I know my intervention is effective?”                         | Efficacy<br>Impact<br>Effects /Affect<br>Effective(ness)<br>Influence<br>Outcome<br>Factors<br>Predictors |
| <b>Adoption</b>      | “How do I develop organizational support to deliver my intervention?” | Adoption<br>Setting<br>Deliver<br>Support<br>Barriers<br>Facilitators                                     |

---

|                       |                                                                                     |                                                                  |
|-----------------------|-------------------------------------------------------------------------------------|------------------------------------------------------------------|
| <b>Implementation</b> | “How do I ensure the intervention is delivered properly?”                           | Implementation<br>Fidelity<br>Protocols                          |
| <b>Maintenance</b>    | “How do I incorporate the intervention so that it is delivered over the long term?” | Maintenance<br>Policy<br>Incorporation<br>Long term<br>Follow-up |

---
